# Supplementary material
Source: PubMed Central journal article supplement (PMC524219)
Supplement: pnas_101_44_15718__2.pdf [file pnas_101_44_15718__2.pdf]

**Table 1. Gene-specific primers used for qRT-PCR assays**

| <b>Gene name</b>                                                      | <b>Abbreviation</b> | <b>Primer</b>      | <b>Primer sequences</b>                               | <b>Accession no.</b> | <b>Amplicon size, bp</b> |
|-----------------------------------------------------------------------|---------------------|--------------------|-------------------------------------------------------|----------------------|--------------------------|
| <b>Acetyl-CoA carboxylase 1</b>                                       | <b>Acc1</b>         | Forward<br>Reverse | AAGTCCTTGGTCGGGAAGTATACA<br>ACTCCCTCAAAGTCATCACAAACA  | XM_109883            | 126                      |
| <b>aP2</b>                                                            | <b>aP2</b>          | Forward<br>Reverse | TTAAAAACACCGAGATTTCTTCAA<br>GGGCCCCGCCATCTAG          | NM_024406            | 102                      |
| <b>Carbohydrate regulatory element binding protein</b>                | <b>Chrebp</b>       | Forward<br>Reverse | CGGGACATGTTTGATGACTATGTC<br>CATCCCATTGAAGGATTCAAATAAA | AF156604             | 105                      |
| <b>Fasting-induced adipose factor</b>                                 | <b>Fiaf</b>         | Forward<br>Reverse | CAATGCCAAATTGCTCCAATT<br>TGGCCGTGGGCTCAGT             | AF278699             | 82                       |
| <b>Fatty acid synthase</b>                                            | <b>Fas</b>          | Forward<br>Reverse | TGGTGAATTGTCTCCGAAAAGA<br>CACGTTTCATCACGAGGTCATG      | AF127033             | 149                      |
| <b>L32 ribosomal protein</b>                                          | <b>L32</b>          | Forward<br>Reverse | CCTCTGGTGAAGCCCAAGATC<br>TCTGGGTTTCCGCCAGTTT          | NM_172086            | 102                      |
| <b>Peroxisome proliferator activated receptor <math>\alpha</math></b> | <b>Ppara</b>        | Forward<br>Reverse | CACCTTCTCTTCCCAAAGCT<br>GCGTCGGACTCGGTCTTCT           | X57638               | 105                      |
| <b>Peroxisome proliferator activated receptor <math>\gamma</math></b> | <b>Pparg</b>        | Forward<br>Reverse | ATGTCTCACAATGCCATCAGGTT<br>GCTCGCAGATCAGCAGACTCT      | U10374               | 116                      |
| <b>Sterol regulatory element binding protein 1</b>                    | <b>Srebp-1</b>      | Forward<br>Reverse | GCATGCCATGGGCAAGTAC<br>CCACATAGATCTCTGCCAGTGTTG       | NM_011480            | 125                      |
