# Supplementary material
Source: PubMed Central journal article supplement (PMC524219)
Supplement: pnas_101_44_15718__4.pdf [file pnas_101_44_15718__4.pdf]

**Table 2. - Bacterial genera and species identified in the cecums of a CONV-R donor mouse and four CONV-D B6 recipients**

| Closest RDP entry*                                | Donor                        |                            | Recipient 1                  |                            | Recipient 2                  |                            | Recipient 3                  |                            | Recipient 4                  |                            |
|---------------------------------------------------|------------------------------|----------------------------|------------------------------|----------------------------|------------------------------|----------------------------|------------------------------|----------------------------|------------------------------|----------------------------|
|                                                   | Total sequences <sup>†</sup> | <98% identity <sup>‡</sup> |
| <b>Acetivibrio</b>                                | <b>1</b>                     | <b>1</b>                   |                              |                            |                              |                            |                              |                            |                              |                            |
| <i>Acetivibrio cellulolyticus</i> (T)             | 1                            | 1                          |                              |                            |                              |                            |                              |                            |                              |                            |
| <b>Anaerophaga</b>                                | <b>4</b>                     | <b>4</b>                   | <b>13</b>                    | <b>13</b>                  | <b>3</b>                     | <b>3</b>                   | <b>7</b>                     | <b>7</b>                   | <b>11</b>                    | <b>11</b>                  |
| <i>Anaerophaga thermohalophila</i> ; Fru22        | 4                            | 4                          | 13                           | 13                         | 3                            | 3                          | 7                            | 7                          | 11                           | 11                         |
| <b>Bacillus</b>                                   | <b>2</b>                     | <b>1</b>                   |                              |                            | <b>2</b>                     | <b>2</b>                   |                              |                            | <b>3</b>                     | <b>3</b>                   |
| <i>Bacillus silvestris</i>                        | 2                            | 1                          |                              |                            | 2                            | 2                          |                              |                            | 3                            | 3                          |
| <b>Bacteroides</b>                                | <b>56</b>                    | <b>52</b>                  | <b>51</b>                    | <b>48</b>                  | <b>47</b>                    | <b>41</b>                  | <b>51</b>                    | <b>47</b>                  | <b>33</b>                    | <b>33</b>                  |
| <i>Bacteroides acidofaciens</i>                   | 14                           | 14                         | 1                            | 1                          | 4                            | 4                          | 1                            | 1                          | 3                            | 3                          |
| <i>Bacteroides acidofaciens</i> ; A24             | 3                            |                            |                              |                            |                              |                            |                              |                            |                              |                            |
| <i>Bacteroides caccae</i> (T); ATCC 43185T        |                              |                            | 2                            | 2                          |                              |                            |                              |                            |                              |                            |
| <i>Bacteroides capillosus</i> ; ATCC 29799        | 12                           | 12                         | 17                           | 16                         | 7                            | 7                          | 12                           | 10                         | 6                            | 6                          |
| <i>Bacteroides cf. forsythus oral clone BU063</i> | 2                            | 2                          | 7                            | 7                          | 1                            | 1                          | 10                           | 10                         | 7                            | 7                          |
| <i>Bacteroides distasonis</i> (T)                 | 12                           | 12                         | 5                            | 5                          | 15                           | 15                         | 3                            | 3                          | 5                            | 5                          |
| <i>Bacteroides eggerthii</i> (T)                  |                              |                            |                              |                            | 1                            |                            |                              |                            |                              |                            |
| <i>Bacteroides merdae</i> (T); ATCC 43184T        |                              |                            |                              |                            | 1                            | 1                          |                              |                            |                              |                            |
| <i>Bacteroides putredinis</i> (T)                 |                              |                            |                              |                            | 1                            | 1                          |                              |                            |                              |                            |
| <i>Bacteroides sp. AR20</i> ; AR20                | 1                            |                            | 1                            | 1                          | 5                            |                            | 6                            | 6                          |                              |                            |

|                                                |           |           |           |           |           |           |           |           |           |           |
|------------------------------------------------|-----------|-----------|-----------|-----------|-----------|-----------|-----------|-----------|-----------|-----------|
| <i>Bacteroides sp. C46; C46</i>                |           |           | 3         | 3         |           |           | 2         | 2         |           |           |
| <i>Bacteroides sp. CJ44; CJ44</i>              |           |           |           |           | 2         | 2         |           |           |           |           |
| <i>Bacteroides sp. CJ47; CJ47</i>              |           |           |           |           |           |           |           |           | 1         | 1         |
| <i>Bacteroides sp. CS21; CS21</i>              |           |           | 1         | 1         | 6         | 6         | 4         | 4         | 1         | 1         |
| <i>Bacteroides sp. CS24; CS24</i>              | 5         | 5         | 5         | 5         | 2         | 2         | 1         | 1         | 6         | 6         |
| <i>Bacteroides sp. oral clone BU045; BU045</i> | 3         | 3         | 5         | 5         |           |           | 1         | 1         | 1         | 1         |
| <i>Bacteroides splanchnicus (T)</i>            | 4         | 4         | 1         | 1         | 1         | 1         | 3         | 3         | 2         | 2         |
| <i>Bacteroides vulgatus (T)</i>                |           |           | 3         | 1         | 1         | 1         | 8         | 6         | 1         | 1         |
| <b>Butyrivibrio</b>                            | <b>1</b>  | <b>1</b>  |           |           | <b>1</b>  | <b>1</b>  | <b>1</b>  | <b>1</b>  | <b>3</b>  | <b>3</b>  |
| <i>Butyrivibrio crossotus; NCDO 2416</i>       |           |           |           |           |           |           | 1         | 1         |           |           |
| <i>Butyrivibrio fibrisolvens; 0/10</i>         | 1         | 1         |           |           | 1         | 1         |           |           | 1         | 1         |
| <i>Butyrivibrio hungatei; JK 615</i>           |           |           |           |           |           |           |           |           | 2         | 2         |
| <b>Candidatus</b>                              |           |           |           |           | <b>3</b>  | <b>3</b>  | <b>1</b>  | <b>1</b>  |           |           |
| <i>Candidatus Arthromitus sp. SFB-trout</i>    |           |           |           |           | 3         | 3         | 1         | 1         |           |           |
| <b>Catonella</b>                               |           |           | <b>2</b>  | <b>2</b>  | <b>1</b>  | <b>1</b>  |           |           |           |           |
| <i>Catonella morbi (T); ATCC 51271</i>         |           |           |           |           | 1         | 1         |           |           |           |           |
| <i>Catonella sp. oral clone BR063; BR063</i>   |           |           | 1         | 1         |           |           |           |           |           |           |
| <i>Catonella sp. oral clone FL037; FL037</i>   |           |           | 1         | 1         |           |           |           |           |           |           |
| <b>Citrobacter</b>                             |           |           | <b>1</b>  | <b>1</b>  |           |           |           |           |           |           |
| <i>Citrobacter</i>                             |           |           | 1         | 1         |           |           |           |           |           |           |
| <b>Clostridium</b>                             | <b>53</b> | <b>47</b> | <b>94</b> | <b>90</b> | <b>65</b> | <b>56</b> | <b>74</b> | <b>73</b> | <b>85</b> | <b>78</b> |
| <i>Clostridium aerotolerans (T); DSM 5434</i>  | 2         | 2         |           |           |           |           | 1         | 1         |           |           |

|                                                       |   |   |    |    |   |   |    |    |    |    |
|-------------------------------------------------------|---|---|----|----|---|---|----|----|----|----|
| <i>Clostridium aff. innocuum</i> CM970; CM970         |   |   |    |    | 1 | 1 | 1  | 1  |    |    |
| <i>Clostridium aminophilum</i> (T); F                 | 1 | 1 | 7  | 7  | 2 | 2 | 4  | 4  | 8  | 8  |
| <i>Clostridium aminovalericum</i>                     |   |   | 1  | 1  |   |   |    |    |    |    |
| <i>Clostridium bolteae</i> ; type strain: 16351       | 6 | 6 | 13 | 13 | 5 | 5 | 13 | 13 | 12 | 12 |
| <i>Clostridium celerecrescens</i> (T); DSM 5628       |   |   | 4  | 4  | 1 | 1 | 2  | 2  |    |    |
| <i>Clostridium celerecrescens</i> ; IrT-JG1-12        |   |   |    |    |   |   |    |    | 1  | 1  |
| <i>Clostridium cellulolyticum</i> (T); ATCC 35319     | 2 | 2 |    |    |   |   |    |    |    |    |
| <i>Clostridium cellulosi</i>                          |   |   | 1  | 1  |   |   |    |    |    |    |
| <i>Clostridium clostridioforme</i> ; 1-53             | 5 | 5 | 3  | 3  | 1 | 1 | 5  | 5  |    |    |
| <i>Clostridium disporicum</i> (T); DSM 5521           | 6 | 3 |    |    |   |   |    |    |    |    |
| <i>Clostridium fimetarium</i> (T); Z-2189             |   |   |    |    | 1 | 1 |    |    |    |    |
| <i>Clostridium fusiformis</i> ; CM973                 | 2 | 1 | 7  | 4  | 5 | 3 | 5  | 4  | 14 | 10 |
| <i>Clostridium glycolicum</i> (T); DSM 1288(T)        | 1 |   |    |    |   |   |    |    |    |    |
| <i>Clostridium hathewayi</i> ; type strain: DSM 13479 | 1 | 1 |    |    | 4 | 4 | 1  | 1  | 3  | 3  |
| <i>Clostridium herbivorans</i> (T); 54408             | 1 | 1 |    |    |   |   |    |    |    |    |
| <i>Clostridium indolis</i> (T); DSM 755               | 1 | 1 |    |    |   |   | 1  | 1  |    |    |
| <i>Clostridium indolis</i> ; CM971                    | 2 | 2 | 5  | 5  | 3 | 3 | 4  | 4  | 5  | 5  |
| <i>Clostridium leptum</i> ; 753                       | 2 | 2 |    |    |   |   |    |    | 2  | 2  |
| <i>Clostridium leptum</i> ; 10900                     |   |   | 3  | 3  | 2 | 2 | 1  | 1  | 4  | 4  |
| <i>Clostridium methylpentosum</i> (T); DSM 5476       |   |   |    |    | 2 | 2 | 2  | 2  | 1  | 1  |
| <i>Clostridium nexile</i> (T); 1-11                   | 1 | 1 | 6  | 6  |   |   | 1  | 1  | 2  | 2  |
| <i>Clostridium nexile</i> (T); DSM 1787               | 1 | 1 |    |    | 3 | 3 | 5  | 5  |    |    |



|                                                 |          |          |          |          |          |          |          |          |          |
|-------------------------------------------------|----------|----------|----------|----------|----------|----------|----------|----------|----------|
| <i>Clostridium sp.</i> ; LIP5                   | 2        | 2        | 2        | 2        | 1        | 1        |          | 1        | 1        |
| <i>Clostridium symbiosum</i> (T)                |          |          | 1        | 1        |          |          |          |          |          |
| <i>Clostridium viride</i> (T); T2-7 (DSM 6836)  | 1        | 1        | 1        |          |          |          | 1        | 1        | 2        |
| <i>Clostridium xylanolyticum</i> (T); ATCC 4963 | 2        | 2        | 8        | 8        | 11       | 11       | 7        | 7        | 11       |
| <b>Coprococcus</b>                              |          |          |          |          |          |          | <b>1</b> | <b>1</b> |          |
| <i>Coprococcus catus</i> ; VPI-C6-61            |          |          |          |          |          |          | 1        | 1        |          |
| <b>Cytophaga</b>                                |          |          | <b>2</b> | <b>2</b> |          |          |          |          |          |
| <i>Cytophaga marinoflava</i> ; ANT9103          |          |          | 1        | 1        |          |          |          |          |          |
| <i>Cytophaga sp.</i> ; BD1-16                   |          |          | 1        | 1        |          |          |          |          |          |
| <b>Desulfitobacterium</b>                       |          |          | <b>1</b> | <b>1</b> |          |          |          |          | <b>1</b> |
| <i>Desulfitobacterium hafniense</i> ; DP7       |          |          | 1        | 1        |          |          |          |          | 1        |
| <b>Desulfomicrobium</b>                         | <b>2</b> | <b>2</b> |          |          |          |          |          |          |          |
| <i>Desulfomicrobium macestii</i> (T); DSM 4194  | 2        | 2        |          |          |          |          |          |          |          |
| <b>Desulfovibrio</b>                            | <b>1</b> | <b>1</b> | <b>2</b> | <b>2</b> | <b>1</b> | <b>1</b> | <b>2</b> | <b>2</b> | <b>1</b> |
| <i>Desulfovibrio oryzae</i> ; DDv               |          |          |          |          |          |          | 1        | 1        |          |
| <i>Desulfovibrio sp.</i> (T); STL1              | 1        | 1        | 2        | 2        |          |          |          |          |          |
| <i>Desulfovibrio sp.</i> UNSW3caefatS           |          |          |          |          | 1        | 1        | 1        | 1        | 1        |
| <b>Eggerthella</b>                              |          |          |          |          |          |          | <b>1</b> | <b>1</b> |          |
| <i>Eggerthella lenta</i> (T); ATCC25559         |          |          |          |          |          |          | 1        | 1        |          |
| <b>Erysipelothrix</b>                           |          |          | <b>1</b> | <b>1</b> |          |          |          |          |          |
| <i>Erysipelothrix rhusiopathiae</i> ; 715       |          |          | 1        | 1        |          |          |          |          |          |

**Escherichia***Escherichia albertii*; type strain: LMG 20976*Escherichia coli***Eubacterium***Eubacterium bifforme* (T); ATCC 27806*Eubacterium cylindroides**Eubacterium desmolans* (T)*Eubacterium oxidoreducens*; DAS110*Eubacterium plexicaudatum*; ASF 492*Eubacterium ramulus* (T)*Eubacterium ruminantium* (T); GA195*Eubacterium siraeum* (T)*Eubacterium* sp. CJ70; CJ70*Eubacterium* sp. oral clone BS091; BS091*Eubacterium* sp. oral clone BU014; BU014*Eubacterium* sp. oral clone FX033; FX033*Eubacterium* sp. oral clone JH012; JH012*Eubacterium* sp. TW2; TW2*Eubacterium* sp. VPI 12708; VPI 12708*Eubacterium ventriosum***Faecalibacterium***Faecalibacterium prausnitzii*; 1-84

|           |           |           |           |           |           |           |           |           |           |   |
|-----------|-----------|-----------|-----------|-----------|-----------|-----------|-----------|-----------|-----------|---|
|           |           |           | <b>3</b>  | <b>3</b>  |           |           | <b>1</b>  | <b>1</b>  |           |   |
|           |           |           | 1         |           |           |           |           |           |           |   |
|           |           |           | 2         |           |           |           | 1         | 1         |           |   |
| <b>18</b> | <b>18</b> | <b>44</b> | <b>42</b> | <b>38</b> | <b>38</b> | <b>21</b> | <b>21</b> | <b>32</b> | <b>32</b> |   |
| 3         | 3         | 3         | 3         |           |           |           |           |           |           |   |
|           |           |           |           | 1         | 1         | 1         | 1         | 1         | 1         | 1 |
| 1         | 1         | 7         | 5         | 6         | 6         |           |           | 7         | 7         |   |
| 2         | 2         | 1         | 1         | 2         | 2         | 2         | 2         |           |           |   |
| 1         | 1         | 16        | 16        | 12        | 12        | 16        | 16        | 15        | 15        |   |
| 3         | 3         | 3         | 3         | 7         | 7         | 1         | 1         | 4         | 4         |   |
|           |           |           |           |           |           |           |           | 1         | 1         |   |
| 1         | 1         | 3         | 3         |           |           |           |           | 1         | 1         |   |
|           |           |           |           |           |           |           |           | 1         | 1         |   |
| 2         | 2         |           |           |           |           |           |           |           |           |   |
| 2         | 2         | 5         | 5         | 1         | 1         |           |           | 1         | 1         |   |
| 1         | 1         | 1         | 1         |           |           |           |           |           |           |   |
|           |           | 1         | 1         |           |           |           |           |           |           |   |
|           |           | 1         | 1         |           |           |           |           |           |           |   |
|           |           | 3         | 3         | 9         | 9         | 1         | 1         | 1         | 1         |   |
| 2         | 2         |           |           |           |           |           |           |           |           |   |
|           |           |           |           |           |           | <b>1</b>  | <b>1</b>  |           |           |   |
|           |           |           |           |           |           | 1         | 1         |           |           |   |

|                                                |           |          |           |          |          |          |          |          |          |          |
|------------------------------------------------|-----------|----------|-----------|----------|----------|----------|----------|----------|----------|----------|
| <b>Firmicutes</b>                              | <b>0</b>  | <b>0</b> | <b>1</b>  | <b>1</b> | <b>5</b> | <b>5</b> | <b>3</b> | <b>3</b> | <b>1</b> | <b>1</b> |
| <i>Firmicutes sp. oral clone AO068; AO068</i>  |           |          |           |          |          |          | 1        | 1        |          |          |
| <i>Firmicutes sp. oral clone BB124; BB124</i>  |           |          |           |          | 1        | 1        |          |          |          |          |
| <i>Firmicutes sp. oral clone CK030; CK030</i>  |           |          | 1         | 1        |          |          |          |          |          |          |
| <i>Firmicutes sp. oral clone F058; F058</i>    |           |          |           |          | 1        | 1        |          |          |          |          |
| <i>Firmicutes sp. oral clone FM046; FM046</i>  |           |          |           |          | 1        | 1        | 2        | 2        |          |          |
| <i>Firmicutes sp. oral strain FTB41; FTB41</i> |           |          |           |          | 2        | 2        |          |          |          |          |
| <i>Firmicutes str. C38; C38</i>                |           |          |           |          |          |          |          |          | 1        | 1        |
| <b>Flavobacterium</b>                          |           |          | <b>3</b>  | <b>3</b> |          |          | <b>3</b> | <b>3</b> |          |          |
| <i>Flavobacterium mizutaii; DSM 11724T</i>     |           |          | 3         | 3        |          |          | 3        | 3        |          |          |
| <b>Herbaspirillum</b>                          |           |          | <b>1</b>  | <b>1</b> |          |          |          |          |          |          |
| <i>Herbaspirillum sp. Chnp3-5; Chnp3-5</i>     |           |          | 1         | 1        |          |          |          |          |          |          |
| <b>Holdemania</b>                              |           |          | <b>1</b>  | <b>1</b> |          |          |          |          |          |          |
| <i>Holdemania filiformis (T); ATCC 51649</i>   |           |          | 1         | 1        |          |          |          |          |          |          |
| <b>Hyphomonas</b>                              | <b>1</b>  | <b>1</b> |           |          |          |          |          |          |          |          |
| <i>Hyphomonas johnsonii (T); MHS-2</i>         | 1         | 1        |           |          |          |          |          |          |          |          |
| <b>Lachnobacterium</b>                         |           |          |           |          |          |          | <b>1</b> | <b>1</b> |          |          |
| <i>Lachnobacterium bovis (T); LRC 5382</i>     |           |          |           |          |          |          | 1        | 1        |          |          |
| <b>Lachnospira</b>                             | <b>1</b>  | <b>1</b> |           |          |          |          | <b>2</b> | <b>2</b> |          |          |
| <i>Lachnospira pectinoschiza; 1-10</i>         | 1         | 1        |           |          |          |          | 2        | 2        |          |          |
| <b>Lactobacillus</b>                           | <b>36</b> | <b>4</b> | <b>16</b> | <b>0</b> | <b>4</b> | <b>0</b> | <b>6</b> | <b>0</b> | <b>3</b> | <b>0</b> |
| <i>Lactobacillus acidophilus; BMF 6Lb6</i>     | 19        |          | 11        |          |          |          | 4        |          |          |          |

|                                                  |          |          |          |          |          |          |          |          |          |          |
|--------------------------------------------------|----------|----------|----------|----------|----------|----------|----------|----------|----------|----------|
| <i>Lactobacillus murinus</i> ; ASF 361           | 1        |          | 3        |          | 4        |          | 1        |          |          |          |
| <i>Lactobacillus reuteri</i> (T); DSM 20016 T    | 2        |          | 2        |          |          |          | 1        |          | 2        |          |
| <i>Lactobacillus</i> sp. ASF360; ASF 360         | 8        |          |          |          |          |          |          |          |          |          |
| <i>Lactobacillus</i> sp. CLE-4; CLE-4            |          |          |          |          |          |          |          |          | 1        |          |
| <i>Lactobacillus</i> sp. oral clone CX036; CX036 | 2        |          |          |          |          |          |          |          |          |          |
| <i>Lactobacillus vitulinus</i> (T)               | 4        | 4        |          |          |          |          |          |          |          |          |
| <b>Marinilabilia</b>                             |          |          | <b>3</b> | <b>3</b> |          |          | <b>1</b> | <b>1</b> |          |          |
| <i>Marinilabilia salmonicolor</i> (T)            |          |          | 3        | 3        |          |          | 1        | 1        |          |          |
| <b>Oscillospira</b>                              | <b>6</b> | <b>6</b> | <b>6</b> | <b>6</b> | <b>7</b> | <b>7</b> | <b>2</b> | <b>2</b> | <b>3</b> | <b>3</b> |
| <i>Oscillospira guillermondii</i> ; OSC2         |          |          | 5        | 5        | 5        | 5        | 2        | 2        | 3        | 3        |
| <i>Oscillospira</i> sp. A; A                     |          |          |          |          | 1        | 1        |          |          |          |          |
| <i>Oscillospira</i> sp. F; F                     |          |          | 1        | 1        |          |          |          |          |          |          |
| <i>Oscillospira</i> sp. G; G                     | 1        | 1        |          |          |          |          |          |          |          |          |
| <i>Oscillospira</i> sp. H; H                     | 1        | 1        |          |          | 1        | 1        |          |          |          |          |
| <i>Oscillospira guillermondii</i> ; OSC3         | 1        | 1        |          |          |          |          |          |          |          |          |
| <i>Oscillospira guillermondii</i> ; OSC5         | 3        | 3        |          |          |          |          |          |          |          |          |
| <b>Papillibacter</b>                             | <b>1</b> | <b>1</b> |          |          |          |          | <b>3</b> | <b>3</b> | <b>1</b> | <b>1</b> |
| <i>Papillibacter cinnaminovorans</i> (T); CIN1   | 1        | 1        |          |          |          |          | 3        | 3        | 1        | 1        |
| <b>Peptococcus</b>                               |          |          | <b>1</b> | <b>1</b> |          |          |          |          |          |          |
| <i>Peptococcus</i> sp. oral clone MCE10_265      |          |          | 1        | 1        |          |          |          |          |          |          |
| <b>Porphyromonas</b>                             | <b>6</b> | <b>6</b> | <b>9</b> | <b>9</b> | <b>6</b> | <b>5</b> | <b>7</b> | <b>7</b> | <b>1</b> | <b>1</b> |
| <i>Porphyromonas canis</i> ; JCM 10100           |          |          | 1        | 1        |          |          |          |          |          |          |



|                                                   |           |           |           |           |          |          |          |          |          |          |
|---------------------------------------------------|-----------|-----------|-----------|-----------|----------|----------|----------|----------|----------|----------|
| <i>Porphyromonas sp. oral clone AW032; AW032</i>  |           |           | 7         | 7         | 1        | 1        | 5        | 5        |          |          |
| <i>Porphyromonas sp. oral clone BR037; BR037</i>  |           |           |           |           |          |          | 1        | 1        |          |          |
| <i>Porphyromonas sp. oral clone BS077; BS077</i>  | 2         | 2         | 1         | 1         | 5        | 5        | 1        | 1        | 1        | 1        |
| <i>Porphyromonas sp. oral clone EP003; EP003</i>  | 4         | 4         |           |           |          |          |          |          |          |          |
| <b>Prevotella</b>                                 | <b>3</b>  | <b>3</b>  | <b>3</b>  | <b>3</b>  | <b>4</b> | <b>4</b> | <b>2</b> | <b>2</b> | <b>3</b> | <b>3</b> |
| <i>Prevotella genomsp. C1; C3MKM081</i>           | 1         | 1         | 2         | 2         | 4        | 4        | 1        | 1        |          |          |
| <i>Prevotella ruminicola; TC2-28</i>              | 2         | 2         |           |           |          |          |          |          |          |          |
| <i>Prevotella sp. oral clone BS041; BS041</i>     |           |           |           |           |          |          | 1        | 1        |          |          |
| <i>Prevotella sp. oral clone F045; F045</i>       |           |           | 1         | 1         |          |          |          |          |          |          |
| <i>Prevotella sp. oral clone FL019; FL019</i>     |           |           |           |           |          |          |          |          | 3        | 3        |
| <b>Roseburia</b>                                  | <b>1</b>  | <b>1</b>  | <b>3</b>  | <b>3</b>  | <b>4</b> | <b>4</b> | <b>4</b> | <b>4</b> | <b>6</b> | <b>6</b> |
| <i>Roseburia intestinalis; L1-8151</i>            |           |           |           |           |          |          | 1        | 1        | 1        | 1        |
| <i>Roseburia intestinalis; L1-82</i>              | 1         | 1         | 3         | 3         | 4        | 4        | 3        | 3        | 5        | 5        |
| <b>Ruminococcus</b>                               | <b>14</b> | <b>14</b> | <b>10</b> | <b>10</b> | <b>8</b> | <b>8</b> | <b>4</b> | <b>4</b> | <b>4</b> | <b>4</b> |
| <i>Ruminococcus albus; OR108</i>                  |           |           | 1         | 1         |          |          |          |          |          |          |
| <i>Ruminococcus bromii</i>                        | 1         | 1         |           |           |          |          |          |          |          |          |
| <i>Ruminococcus callidus (T); ATCC 27760</i>      | 1         | 1         |           |           |          |          | 1        | 1        |          |          |
| <i>Ruminococcus flavefaciens</i>                  | 2         | 2         | 1         | 1         | 1        | 1        | 1        | 1        |          |          |
| <i>Ruminococcus gnavus (T); ATCC 29149</i>        | 3         | 3         | 2         | 2         | 2        | 2        |          |          | 1        | 1        |
| <i>Ruminococcus hydrogenotrophicus (T); S5a36</i> |           |           | 1         | 1         |          |          |          |          |          |          |
| <i>Ruminococcus lactaris (T); ATCC 29176</i>      |           |           | 1         | 1         |          |          |          |          |          |          |
| <i>Ruminococcus productus (T); ATCC 27340</i>     | 4         | 4         |           |           | 3        | 3        |          |          | 2        | 2        |



**Xiphinematobacter**

*Xiphinematobacter rivesi*

**Xylophilus**

*Xylophilus ampelinus*; DSM 7250

|          |          |          |          |  |  |  |  |
|----------|----------|----------|----------|--|--|--|--|
| <b>1</b> | <b>1</b> |          |          |  |  |  |  |
| 1        | 1        |          |          |  |  |  |  |
|          |          | <b>1</b> | <b>1</b> |  |  |  |  |
|          |          | 1        | 1        |  |  |  |  |

\* Bacterial 16S rDNA Ribosomal Database Project (RDP) entries are organized by genus (bold type) with specific RDP entries listed below each genus heading (plain type).

† Total number of 16S rDNA clones that (i) passed the selection criteria described in *Materials and Methods*, and (ii) were homologous to the respective RDP entry with species or genus information.

‡ 16S clones that are defined as "unidentified" (shaded columns) because their closest relative in RDP is either (i) an entry without species assignment, or (ii) an entry with species or genus assignment but with > 98% identity to the respective rDNA sequence. These clones are listed according to their closest relative in RDP with species or genus assignment. GenBank accession nos. for the sequences are AY667702-AY668946. Further details of homology analyses are available at <http://gordonlab.wustl.edu/>.
