# Supplementary material
Source: PubMed Central journal article supplement (PMC524219)
Supplement: pnas_101_44_15718__5.pdf [file pnas_101_44_15718__5.pdf]

**Table 3. Comparison of metabolites in tissues harvested from B6 GF and CONV-D mice**

| Metabolite (pmol/mg protein) | Gastrocnemius muscle |                | Liver       |              |
|------------------------------|----------------------|----------------|-------------|--------------|
|                              | GF                   | CONV-D         | GF          | CONV-D       |
| Citrate                      | 3.57 ± 0.28          | 5.03 ± 0.25**  | 4.61 ± 0.53 | 6.33 ± 0.59* |
| α-Ketoglutarate              | 2.11 ± 0.17          | 2.78 ± 0.09*   | 1.88 ± 0.13 | 2.18 ± 0.25  |
| Malate                       | 1.65 ± 0.08          | 4.14 ± 0.53 ** | 1.30 ± 0.17 | 2.19 ± 0.32* |
| ATP                          | 18.48 ± 1.28         | 20.31 ± 1.62   | 2.50 ± 1.14 | 1.62 ± 0.50  |
| Phosphocreatine              | 152.1 ± 12.4         | 177.7 ± 14.1   | 1.74 ± 0.23 | 1.61 ± 0.36  |
| NAD                          | 1.25 ± 0.23          | 0.67 ± 0.06    | 0.77 ± 0.18 | 0.31 ± 0.08  |
| NADH                         | 2.08 ± 0.14          | 3.14 ± 0.16**  | 2.01 ± 0.10 | 2.27 ± 0.09  |

\*,  $P < 0.05$ ; \*\*,  $P < 0.01$  compared with GF. All significant differences are in gray.
