# Supplementary material
Source: PubMed Central journal article supplement (PMC524219)
Supplement: pnas_101_44_15718__8.pdf [file pnas_101_44_15718__8.pdf]

## A PhyloCon Prediction

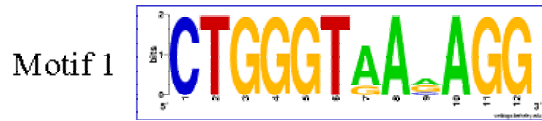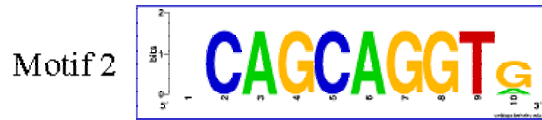

## Closest TRANSFAC entry

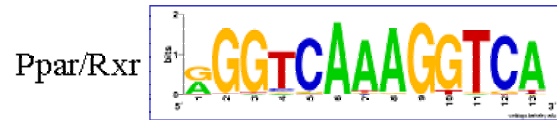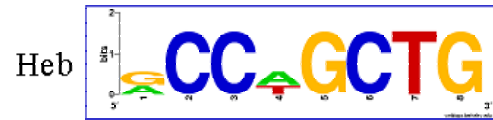

## B Other Conserved Motif Families

### Representative Logo

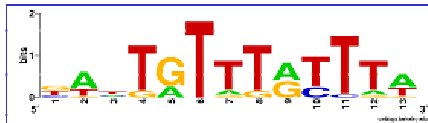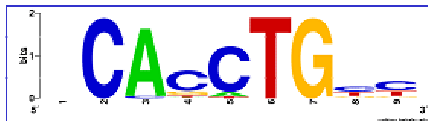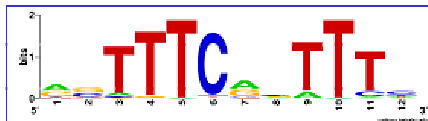

### Corresponding Matrices

**Fork head box, recognized by HNF3, HNF4, HFH8 and other fork head homologs**

**E-box, recognized by E12, E47, MyoD, Myogenin and other HLH proteins**

**ISRE, interferon responsive element, recognized by interferon regulatory factors 1 to 7.**
