# Supplementary material
Source: PubMed Central journal article supplement (PMC524219)
Supplement: pnas_101_44_15718__9.pdf [file pnas_101_44_15718__9.pdf]

**Table 4. Conserved transcription factor binding sites identified in orthologous *Fiaf* genes**

| TRANSFAC matrices | Consensus          | No. of potential sites |   |   |    |    | CHN | Notes                                                   |
|-------------------|--------------------|------------------------|---|---|----|----|-----|---------------------------------------------------------|
|                   |                    | H                      | M | R | Z  | F  |     |                                                         |
| AP1_Q1            | NNNTGAGTCAKCN      | 2                      | 4 | 1 | 3  | 3  | 1   | Ap1 site, activator protein 1                           |
| AP1_C             | NTGASTCAG          | 5                      | 2 | 1 | 6  | 2  | 1   | Ap1 site, activator protein 1                           |
| AP4_Q6            | CWCAGCTGGN         | 4                      | 2 | 2 | 2  | 4  | 1   | Ap4 site, activator protein 4                           |
| CEBPGAMMA_Q6      | CTBATTTCARAAW      | 1                      | 1 | 5 | 9  | 4  | 1   | CCAAT enhancer binding protein                          |
| CREL_Q1           | SGGRNTTTC          | 2                      | 3 | 4 | 2  | 2  | 1   | C-Rel, overlap with NFkB                                |
| DR1_Q3            | RGGNCAAAGGTCA      | 2                      | 2 | 4 | 2  | 2  | 1   | PPAR, HNF4, direct repeat                               |
| E12_Q6            | RRCAGGTGNCV        | 3                      | 3 | 2 | 4  | 6  | 1   | E-box                                                   |
| E2A_Q2            | NCACCTGYNCNKN      | 2                      | 3 | 3 | 5  | 5  | 1   | E-box                                                   |
| ETS_Q4            | ANNCACCTCCTG       | 3                      | 3 | 3 | 4  | 4  | 1   | C-Ets, T-cell, mesodermal cell development              |
| FAC1_Q1           | NNNCAMAACACRNA     | 2                      | 1 | 5 | 9  | 2  | 1   | Fac1 site, fetal Alz-50 clone 1                         |
| FOXD3_Q1          | NAWTGTTTTRTT       | 2                      | 7 | 4 | 31 | 5  | 3   | Fork head box D3                                        |
| FO XO1_Q1         | NNNWAAYAAAYANNNNN  | 3                      | 5 | 4 | 22 | 14 | 2   | Fork head box O1                                        |
| FO XO4_Q1         | RWAAACAANNN        | 2                      | 4 | 4 | 18 | 9  | 1   | Fork head box O4                                        |
| FOX_Q2            | KAWTGTTRTTW        | 1                      | 3 | 5 | 16 | 7  | 1   | Fork head factor                                        |
| GC_Q1             | NRGGGGCGGGCNK      | 8                      | 4 | 4 | 2  | 3  | 2   | GC box                                                  |
| GR_Q6             | NNNNNNC NNTGTNCTNN | 3                      | 1 | 1 | 2  | 1  | 1   | glucocorticoid receptor site                            |
| HFH8_Q1           | NNNTGTTTATNTR      | 1                      | 5 | 5 | 15 | 8  | 1   | HNF3, Fkh8 site                                         |
| HNF3ALPHA_Q6      | TRTTTGYTYWN        | 1                      | 5 | 4 | 22 | 4  | 1   | HNF3-alpha site                                         |
| HNF3_Q6           | NWRARYAAAYANN      | 1                      | 6 | 3 | 28 | 7  | 1   | HNF3 site                                               |
| HNF4ALPHA_Q6      | VTGAAC TTTGMMB     | 2                      | 2 | 1 | 5  | 3  | 1   | HNF4-alpha site                                         |
| HSF_Q6            | TTCCMGARGYTTC      | 1                      | 3 | 3 | 1  | 1  | 3   | Heat shock factor site                                  |
| ICSBP_Q6          | RAARTGAAACTG       | 1                      | 3 | 4 | 9  | 3  | 1   | ICSBP, interferon factor binding site                   |
| IRF7_Q1           | TNSGAAWNCGAAANTNNN | 1                      | 1 | 1 | 6  | 2  | 1   | interferon regulatory factor 7                          |
| IRF_Q6            | BNCRSTTTCANTTY     | 4                      | 4 | 6 | 11 | 7  | 1   | Interferon regulatory factors                           |
| ISRE_Q1           | CAGTTTCWC TTYCC    | 2                      | 1 | 2 | 4  | 1  | 1   | Interferon stimulated response element                  |
| LBP1_Q6           | CAGCTGS            | 2                      | 3 | 4 | 5  | 8  | 2   | TATA box repressor                                      |
| LDSPOLYA_B        | NNNSTGTGTDYYCW TN  | 2                      | 3 | 2 | 6  | 3  | 1   | Lentiviral Poly A downstream element                    |
| LFA1_Q6           | GGGSTCWR           | 1                      | 2 | 2 | 1  | 3  | 1   | AID1; HNF-2; LFA1 site                                  |
| LMO2COM_Q1        | CNCCAGGTGBNN       | 2                      | 2 | 3 | 2  | 10 | 1   | LIM-only protein 2 site                                 |
| MEIS1_Q1          | NNNTGACAGNNN       | 1                      | 2 | 2 | 5  | 5  | 2   | myeloid ecotropic viral integration site 1              |
| MYOD_Q6           | NNCACCTGNY         | 2                      | 3 | 2 | 7  | 6  | 1   | myoblast determining factor site                        |
| MYOGENIN_Q6       | RGCAGSTG           | 2                      | 4 | 4 | 8  | 7  | 1   | Myogenin site                                           |
| NF1_Q6            | NNTTGGC NNNNNCCNNN | 1                      | 2 | 3 | 1  | 3  | 2   | nuclear factor 1 site                                   |
| NFE2_Q1           | TGCTGAGTCAY        | 3                      | 1 | 1 | 3  | 1  | 1   | nuclear factor erythroid 2 p45 site                     |
| PIT1_Q6           | NMTTCATAWWTATNMNA  | 2                      | 8 | 5 | 18 | 7  | 1   | Pit1, POU1F1 binding site                               |
| POU1F1_Q6         | ATGAATAAWT         | 2                      | 5 | 2 | 15 | 3  | 1   | POU1F1 binding site                                     |
| PPAR_DR1_Q2       | TGACCTTGNC CY      | 1                      | 2 | 5 | 1  | 3  | 1   | peroxisome proliferator-activated receptor binding site |
| PU1_Q6            | WGAGGAAG           | 5                      | 5 | 4 | 2  | 6  | 2   | Pu.1 site, interfere with erythroblast differentiation  |
| SP1_Q1            | GGGGCGGGGT         | 4                      | 1 | 2 | 0  | 2  | 1   | Sp1 site, stimulating protein 1                         |
| SP1_Q6            | NGGGGGCGGGGYN      | 8                      | 3 | 5 | 2  | 4  | 2   | Sp1 site, stimulating protein 1                         |
| TAL1BETA E47_Q1   | NNNAACAGATGKTNNN   | 1                      | 2 | 1 | 3  | 2  | 1   | Tal-1beta/E47 heterodimer binding site                  |

List of the TRANSFAC matrices that meet the selection criteria described above. Column 1, name of the TRANSFAC matrix. Column 2, consensus sequence of the matrix defined by using the International Union of Pure and Applied Chemistry (IUPAC) alphabet (M equals A or C; R, A or G; W, A or T; S, C or G; Y, C or T; K, G or T; V, A or C or G; H, A or C or T; D, A or G or T; B, C or G or T; and N, A or C or G or T). Column 3, number of high scoring sites in each sequence based on the results of applying the program PATSER to the selected genomic sequence. HMRZF each represents the species of the selected sequence (H-human, M-mouse, R-rat, Z-zebra fish, F-fugu). Column 4, CHN statistic (defined in ref. 1), number of high scoring sites that appear in conserved blocks between human and mouse *Fiaf* genes. Column 5, a description of the matrix based on the TRANSFAC database annotation.

1. Hu, Y., Wang, T., Stormo, G. D. & Gordon, J. I. (2004) *Proc. Natl. Acad. Sci. USA* **101**, 5559-5564.
