# Supplementary material
Source: PubMed Central journal article supplement (PMC524219)

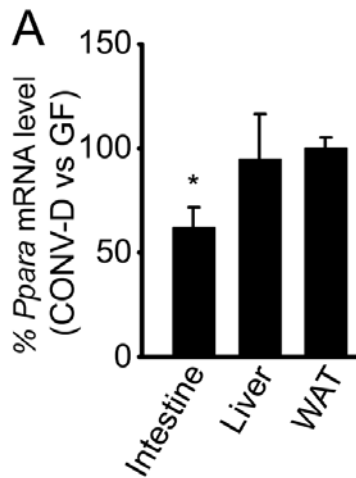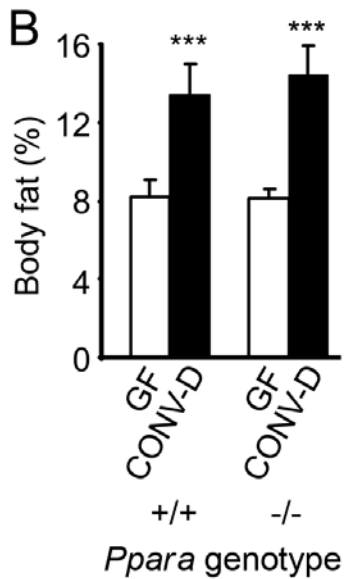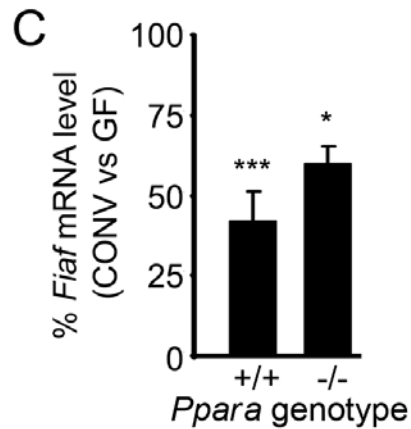

Supplement: pnas_101_44_15718__10.pdf [file pnas_101_44_15718__10.pdf]

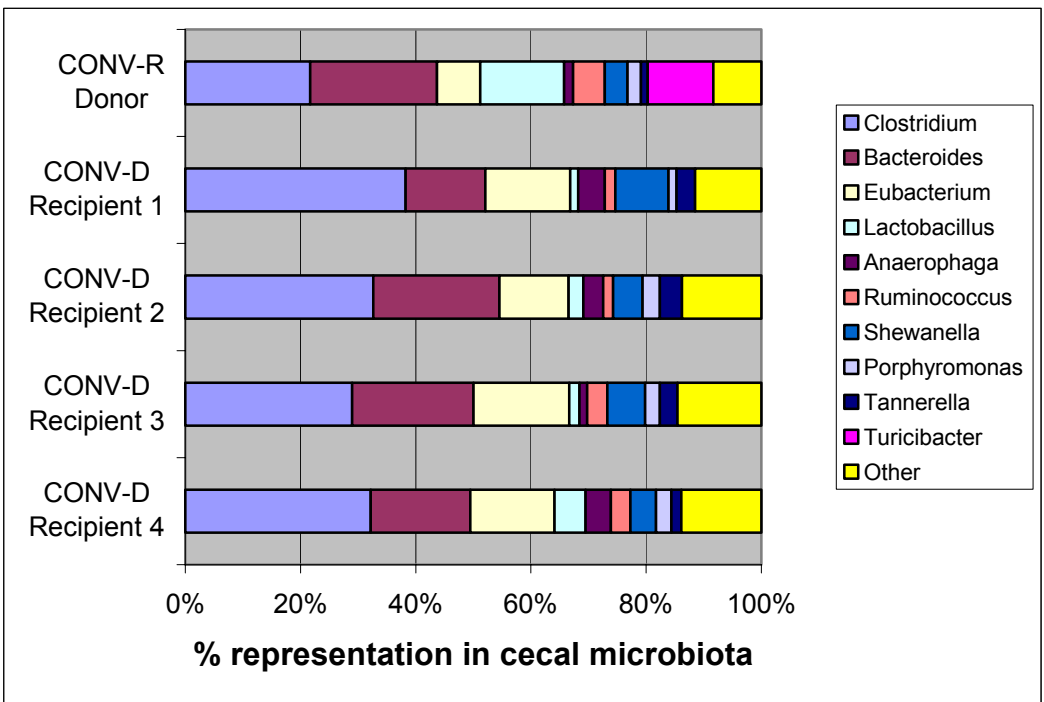

Supplement: pnas_101_44_15718__3.pdf [file pnas_101_44_15718__3.pdf]

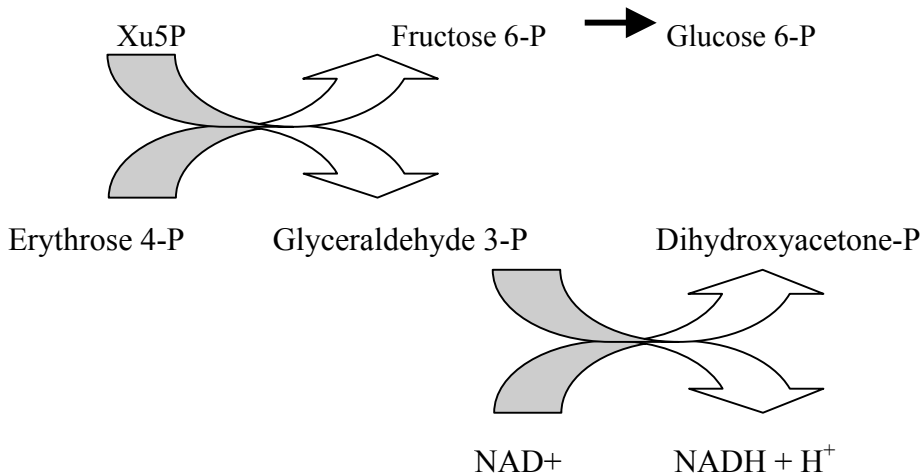

Supplement: pnas_101_44_15718__6.pdf [file pnas_101_44_15718__6.pdf]

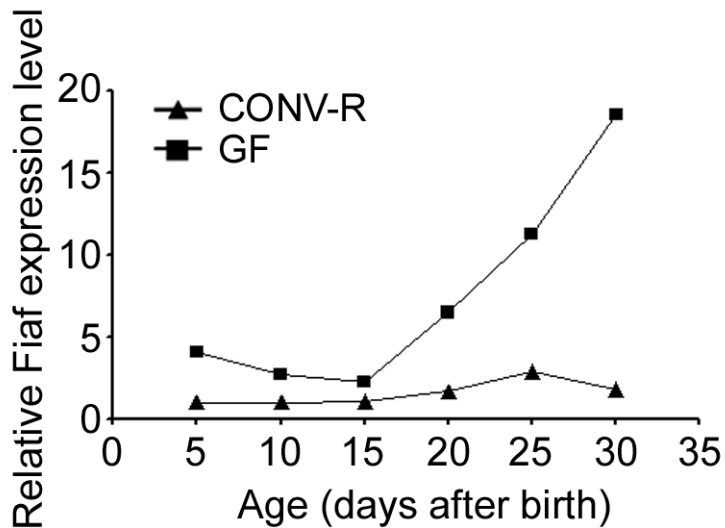

Supplement: pnas_101_44_15718__7.pdf [file pnas_101_44_15718__7.pdf]
